# Supplementary material for: Splenic Red Pulp Macrophages Produce Type I Interferons as Early Sentinels of Malaria Infection but Are Dispensable for Control
Source: PubMed Central journal article supplement (PMC3483282; doi:10.1371/journal.pone.0048126), 2012-10-29

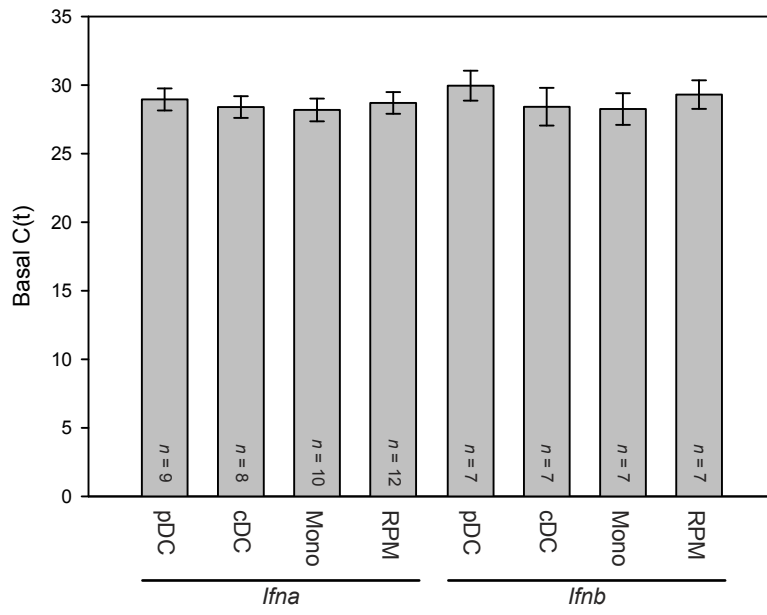

Supplement: pone.0048126.s005.pdf [file pone.0048126.s005.pdf]
