# Supplementary material for: Splenic Red Pulp Macrophages Produce Type I Interferons as Early Sentinels of Malaria Infection but Are Dispensable for Control
Source: PLoS One. 2012 Oct 29;7(10):e48126. doi: 10.1371/journal.pone.0048126 (PMC3483282; doi:10.1371/journal.pone.0048126)
Supplement: Table S1 — Genes induced in whole blood by P. chabaudi at 24 h post-infection. (XLSX) [file pone.0048126.s008.xlsx]

## Sheet: sig117
UNIQID	NAME	Fold Change (Pc/Mock) B6	FC Ifnar1	FC Ifngr1	FC Ifnar1 Ifngr1	FC Stat1
mMC009244	STEAP family member 4 (Steap4)	2.61172	3.89062	1.27015	0.841382	1.79005
mMC100078	adhesion molecule, interacts with CXADR antigen 1 (Amica1)	1.85639	1.10445	1.34412	0.964264	1.30586
mMC024950	leukocyte immunoglobulin-like receptor, subfamily B, member 4 (Lilrb4)	1.96564	1.04247	1.52979	1.00231	1.98618
mMC009749	transcription factor EC (Tcfec)	1.95206	1.10191	1.54043	0.986233	1.48452
mMC004932	bone marrow stromal cell antigen 1 (Bst1)	2.52275	2.23199	1.82134	0.934651	1.60214
mMC022593	chemokine (C-X-C motif) ligand 2 (Cxcl2)	2.45056	0.838956	2.38392	0.777816	2.36199
mMC011595	interleukin 6 (Il6)	3.57266	1.29534	2.14355	0.687771	1.94531
mMC100426	zinc finger protein 213 (Zfp213)	3.32303	2.45377	1.20581	1.25266	1.18921
mMC018907	ubiquitin specific peptidase 18 (Usp18)	3.56195	1.35191	1.69349	0.934651	0.787308
mMC004775	lectin, galactose binding, soluble 9 (Lgals9)	1.78592	1.16473	1.40444	1.09809	1.05702
mMA033055	lectin, galactose binding, soluble 9 (Lgals9)	1.82316	0.99654	1.46071	1.07923	1.01396
mMC020533	2'-5' oligoadenylate synthetase 1G|2'-5' oligoadenylate synthetase 1A (Oas1g Oas1a)	2.1869	1.05336	1.43396	0.48858	0.923382
mMC018541	lymphocyte antigen 6 complex, locus C1|lymphocyte antigen 6 complex, locus C2 (Ly6c1 Ly6c2)	1.9752	0.988514	1.42734	0.755236	0.795536
mMC101123	mMC101123	2.74473	1.06437	1.94981	0.80107	1.04608
mMR026533	poly (ADP-ribose) polymerase family, member 14 (Parp14)	2.12285	1.07177	1.66248	1.31039	0.904379
mMR030870	RIKEN cDNA A530023O14 gene (A530023O14Rik)	2.43659	1.33793	1.84463	1.0479	1.10957
mMR026646	RIKEN cDNA A530064D06 gene (A530064D06Rik)	2.694	1.08799	2.51693	1.12117	2.00694
mMC003934	interleukin 1 receptor, type II (Il1r2)	2.74473	2.56685	2.65124	1.06069	2.15099
mMC022606	MAS-related GPR, member A2 (Mrgpra2)	3.24058	1.43893	2.31071	1.10445	1.89212
mMC002484	immunoresponsive gene 1 (Irg1)	4.77665	2.22427	3.23403	1.1607	1.20581
mMC011115	nucleotide-binding oligomerization domain containing 2 (Nod2)	2.07916	1.20303	1.67404	0.820742	1.51047
mMC021817	interleukin 18 (Il18)	2.51577	0.845768	1.88775	0.890384	1.07177
mMC022890	membrane-spanning 4-domains, subfamily A, member 6D (Ms4a6d)	4.03411	1.09303	2.83497	1.15069	1.30134
mMC017690	membrane-spanning 4-domains, subfamily A, member 6D (Ms4a6d)	3.81055	1.28639	2.11404	1.03347	1.25701
mMC020632	DNA segment, Chr 14, ERATO Doi 668, expressed (D14Ertd668e)	2.63536	1.23399	1.88339	1.03886	0.832199
mMR030864	DEAD (Asp-Glu-Ala-Asp) box polypeptide 58 (Ddx58)	2.51267	1.24833	1.51572	1.08048	0.90125
mMA033726	signal transducer and activator of transcription 1 (Stat1)	2.21299	2.05148	1.51572	1.05093	0.982821
mMC024858	mMC024858	5.53564	10.173	1.82344	0.957603	1.06437
mMR028612	interferon inducible GTPase 1 (Iigp1)	11.1116	14.7912	1.99078	0.904379	0.885768
mMC021241	interferon inducible GTPase 1 (Iigp1)	12.4187	12.6992	1.84463	1.34723	0.867539
mMC011991	T-cell specific GTPase (Tgtp)	4.93635	4.36707	2.58471	0.987943	1.06807
mMC007052	guanylate nucleotide binding protein 5 (Gbp5)	4.98295	3.00355	2.57279	1.07736	1.51047
mMC019577	CD274 antigen (Cd274)	4.08122	2.01857	1.98618	0.94442	1.03168
mMC024746	guanylate nucleotide binding protein 2 (Gbp2)	6.88972	5.54044	2.08012	1.02574	1.05702
mMC025349	interferon gamma induced GTPase (Igtp)	2.60991	1.9816	1.63203	1	0.972655
mMC000979	interleukin 18 binding protein (Il18bp)	3.24701	2.82843	2.09459	0.918594	1.1607
mMR028602	suppressor of cytokine signaling 1 (Socs1)	3.44618	2.19365	1.76949	0.882703	1.00347
mMR027974	poly (ADP-ribose) polymerase family, member 9 (Parp9)	2.26555	1.35347	1.87471	1.03826	0.771105
mMC025225	interferon inducible GTPase 2 (Iigp2)	3.00673	2.34026	2.04675	0.882703	0.955945
mMC003495	guanylate nucleotide binding protein 3 (Gbp3)	3.04829	1.68568	2.80241	0.898132	0.843816
mMC016938	serine (or cysteine) peptidase inhibitor, clade A, member 3F (Serpina3f)	3.32751	3.37916	1.84463	0.982253	1.15269
mMC007427	chemokine (C-C motif) ligand 12 (Ccl12)	6.13745	1.25266	4.22807	1.1487	1.03526
mMC001992	2'-5' oligoadenylate synthetase-like 1 (Oasl1)	2.16212	1.09177	1.60585	1.12117	1.12896
mMC024156	chemokine (C-C motif) receptor-like 2 (Ccrl2)	2.49018	1.29534	1.85746	1.10573	1.03886
mMC013715	chemokine (C-X-C motif) ligand 10 (Cxcl10)	20.055	2.07053	6.74273	1.10382	1.13682
mMC020923	torsin family 3, member A (Tor3a)	2.59908	0.972655	1.91853	0.987943	1.06807
mMC023596	2'-5' oligoadenylate synthetase 1G (Oas1g)	2.24428	1.08172	1.39797	1.06622	0.913831
mMR027562	myeloid cell nuclear differentiation antigen|interferon activated gene 205 (Mnda Ifi205)	9.20872	1.93634	4.86801	0.893475	0.946058
mMC012881	receptor transporter protein 4 (Rtp4)	1.87942	1.22264	1.87905	1.02811	1.04972
mMC010618	schlafen 5 (Slfn5)	7.23615	1.42076	3.7755	1.20164	0.888843
mMC025156	cDNA sequence BC013672 (BC013672)	5.8665	1.50525	2.85469	1.03886	1.00696
mMA035547	mMA035547	7.25512	1.47427	2.58471	1.13682	0.959264
mMC019312	interferon activated gene 205 (Ifi205)	10.5927	1.85318	2.7384	0.952638	0.817902
mMC024032	interferon-induced protein with tetratricopeptide repeats 3 (Ifit3)	6.06707	1.39152	2.20891	1.11471	0.955945
mMC012417	interferon-induced protein with tetratricopeptide repeats 2 (Ifit2)	6.85478	1.42405	4.21831	1.0811	0.929805
mMC010553	interferon induced with helicase C domain 1 (Ifih1)	7.28031	1.55114	4.16986	0.902814	0.812252
mMC025695	myxovirus (influenza virus) resistance 2 (Mx2)	3.44984	1.25122	2.32678	1.02278	0.885768
mMC020260	cDNA sequence BC013672 (BC013672)	4.73855	1.69545	4.01853	1.29834	0.982821
mMC017279	schlafen 4 (Slfn4)	13.9912	4.9818	9.51366	1.18304	1.46917
mMC005508	thymidylate kinase family LPS-inducible member (Tyki)	9.65687	2.14355	5.20537	1.05885	0.96929
mMC013848	interferon-induced protein with tetratricopeptide repeats 1 (Ifit1)	7.14698	2.62079	4.30695	0.90125	1.17283
mMC013685	ring finger protein 213 (Rnf213)	2.77214	1.10957	1.8489	1.0087	0.96929
mMR030989	poly (ADP-ribose) polymerase family, member 12 (Parp12)	2.86924	1.60956	1.78592	1.05519	1.01748
mMC016180	poly (ADP-ribose) polymerase family, member 12 (Parp12)	3.10396	1.37872	2.39496	0.977725	0.82645
mMC009824	immunity-related GTPase family, M (Irgm)	3.14051	2.6087	1.93634	1.05885	1.08673
mMC000953	2'-5' oligoadenylate synthetase 2 (Oas2)	4.30198	1.46409	3.25653	0.815072	0.882703
mMC019234	transcription factor B2, mitochondrial|gene model 1818, (NCBI) (Tfb2m Gm1818)	2.0392	1.05458	1.56555	0.934651	0.907519
mMC009139	2'-5' oligoadenylate synthetase-like 2 (Oasl2)	2.12874	1.87905	1.76949	0.857079	1.10191
mMC009424	interleukin 15 (Il15)	2.54128	1.07923	1.88775	0.926588	0.976032
mMR030098	signal transducer and activator of transcription 1 (Stat1)	2.06051	1.73307	1.48796	1.02633	0.90125
mMC007217	RIKEN cDNA A630077B13 gene (A630077B13Rik)	2.48037	1.38831	1.32562	0.955945	1.01045
mMC012433	guanylate binding protein 6 (Gbp6)	2.89588	1.88339	2.14355	1.2505	1.01045
mMC020765	deltex 3-like (Drosophila) (Dtx3l)	1.94951	1.18099	1.23971	1.01045	1.05336
mMR026790	cDNA sequence BC057170 (BC057170)	2.70945	1.93634	1.54043	0.904379	0.920188
mMC026094	SAM domain and HD domain, 1 (Samhd1)	2.20076	1.54756	1.45734	0.943329	1.10573
mMC006893	SAM domain and HD domain, 1 (Samhd1)	2.2253	1.59107	1.6245	0.976032	1.09809
mMC006622	Fc receptor, IgG, low affinity IV (Fcgr4)	2.0209	1.30134	1.4406	0.982821	1.07177
mMC025310	PHD finger protein 11 (Phf11)	4.00277	1.14076	1.97247	0.907519	1
mMC024437	interferon activated gene 205|interferon activated gene 203|myeloid cell nuclear differentiation antigen (Ifi205 Ifi203 Mnda)	2.46855	0.968171	1.59107	0.991373	0.989657
mMC021322	expressed sequence AI451617 (AI451617)	2.03496	1.23114	1.37872	1.01924	0.986233
mMC024994	tripartite motif protein 30 (Trim30)	3.49106	1.47768	2.56685	0.939523	1.04247
mMC001101	placenta-specific 8 (Plac8)	2.36854	1.1434	1.96791	0.907519	1.09051
mMC019705	membrane-spanning 4-domains, subfamily A, member 4C (Ms4a4c)	3.40818	0.950439	2.38943	1.09809	1.11729
mMC024853	cDNA sequence BC094916 (BC094916)	3.06359	0.890899	2.13366	0.924984	1.01748
mMA032762	interferon activated gene 205|myeloid cell nuclear differentiation antigen|interferon activated gene 203 (Ifi205 Mnda Ifi203)	3.21813	0.899171	2.11893	0.870551	0.939523
mMA033534	interferon activated gene 203 (Ifi203)	2.05623	0.963707	1.3692	0.909093	1.27899
mMA035185	interferon activated gene 203 (Ifi203)	2.11991	1.02574	1.33176	0.832199	0.96929
mMR026842	RIKEN cDNA I830012O16 gene|interferon-induced protein with tetratricopeptide repeats 3 (I830012O16Rik Ifit3)	4.99167	1.65864	1.52626	1.21911	0.96929
mMC015428	MAX dimerization protein 1 (Mxd1)	2.47255	1.54756	1.8489	1.22688	2.05623
mMC021173	GTPase, very large interferon inducible 1 (Gvin1)	2.45037	2.03731	1.47768	1.06622	1.00347
mMA033083	interferon activated gene 203 (Ifi203)	1.95944	0.963707	1.64338	0.984525	0.879649
mMC006436	RIKEN cDNA 2700019D07 gene (2700019D07Rik)	2.11257	0.89296	1.96791	0.87206	1.30134
mMC018950	lipase, endothelial (Lipg)	9.22504	1.49485	3.29436	1.06683	1.29684
mMC012328	mMC012328	4.95539	1.71713	2.24492	0.976032	0.817902
mMC100640	chemokine (C-C motif) ligand 12 (Ccl12)	3.67347	1.21982	1.90308	1.1708	1.08298
mMC100490	F-box protein 39 (Fbxo39)	2.40744	1.41095	1.68179	1.2505	1.02101
mMC004204	transmembrane protein 67 (Tmem67)	2.08385	1.0693	1.45397	1.02456	0.976032
mMC015136	eukaryotic translation initiation factor 2-alpha kinase 2 (Eif2ak2)	2.65737	1.03526	1.86607	0.858565	0.870551
mMC003293	complement factor B (Cfb)	3.48945	1.53333	1.13419	1.02456	1.23114
mMC020628	RIKEN cDNA A530045L16 gene (A530045L16Rik)	2.88786	2.37841	1.60214	0.702222	1.14472
mMC018948	ganglioside-induced differentiation-associated-protein 10 (Gdap10)	2.13022	1.72907	1.42734	1.07923	1.09809
mMC009638	caspase 4, apoptosis-related cysteine peptidase (Casp4)	2.07916	1.1487	1.45062	1.04608	1.28343
mMC012064	Fanconi anemia, complementation group F (Fancf)	14.8483	10.8278	1.96791	0.999423	1.31494
mMC010121	SLAM family member 8 (Slamf8)	2.10571	1.88557	NA	0.799683	1.05702
mMR100086	predicted gene, EG634650 (EG634650)	2.01566	2.27101	1.29534	0.917004	1.17691
mMA031507	caspase 4, apoptosis-related cysteine peptidase (Casp4)	2.17799	1.31646	1.66248	0.97942	1.00696
mMC010522	pre-B-cell colony-enhancing factor 1 (Pbef1)	1.97095	1.73307	1.86176	1	1.09429
mMC015201	heat shock protein 1B (Hspa1b)	2.62079	1.33793	1.45397	0.915416	1.37078
mMC007031	interferon-induced protein 44 (Ifi44)	2.3198	1.26576	1.53688	0.974342	1.05702
mMC009969	MAD homolog 7 (Drosophila) (Smad7)	0.49141	0.780967	0.770215	0.806642	1.60214
mMC012296	spinster homolog 2 (Drosophila) (Spns2)	0.364502	0.476319	0.450625	0.957603	1.6644
mMC003600	brain expressed myelocytomatosis oncogene (Bmyc)	0.40388	0.556068	0.50581	0.833642	0.873573
mMC013349	complement receptor 2 (Cr2)	0.447912	0.34151	0.395934	0.920188	1.12506
mMC100872	X Kell blood group precursor related X linked (Xkrx)	0.287495	NA	NA	0.772443	1.06437
mMC013531	RIKEN cDNA D230012E17 gene (D230012E17Rik)	0.419413	0.427304	0.562529	0.876606	1.02101
mMC017935	Ral GEF with PH domain and SH3 binding motif 2 (Ralgps2)	0.457233	0.387786	0.583714	0.891929	1.29684
mMR029994	hydrogen voltage-gated channel 1 (Hvcn1)	0.418413	0.4954	0.444421	0.931418	0.986233
